# Supplementary material for: Sustainable remediation of paint factory wastewater using electrocoagulation
Source: Royal Society of Chemistry journal article supplement (doi:10.1039/d3ew00845b), 2024-01-01
Supplement: d3ew00845b1.pdf [file d3ew00845b1.pdf]

## Supplementary information

### Sustainable Remediation of Paint Factory Wastewater Using Electrocoagulation

Gabriel Horváth<sup>1, \*</sup>, Zsolt Szalay<sup>1</sup>, František Šimo<sup>1</sup>, Barbora Vidová<sup>1</sup>, Patrik Hlavanda<sup>1</sup>, Agneša Szarka<sup>2</sup>, Svetlana Hrouzková<sup>2</sup>, Stanislava Debnárová<sup>3</sup>, František Zažímal<sup>3</sup>, Tomáš Homola<sup>4</sup>

<sup>1</sup>HOFITECH s.r.o., Čukáraboň 7382/73, 929 01 Dunajská Streda, Slovakia

<sup>2</sup>Institute of Analytical Chemistry, Faculty of Chemical and Food Technology, Slovak University of Technology in Bratislava, Radlinského 9, 812 37 Bratislava, Slovakia

<sup>3</sup>CEPLANT - R&D centre for Plasma and Nanotechnology Surface Modifications, Department of Plasma Physics and Technology, Faculty of Science, Masaryk University, Kotlářská 267/2, 602 00 Brno, Czech Republic

<sup>4</sup>Department of Environmental Engineering, Institute of Chemical and Environmental Engineering, Faculty of Chemical and Food Technology, Slovak University of Technology, Radlinského 9, 812 37 Bratislava, Slovakia

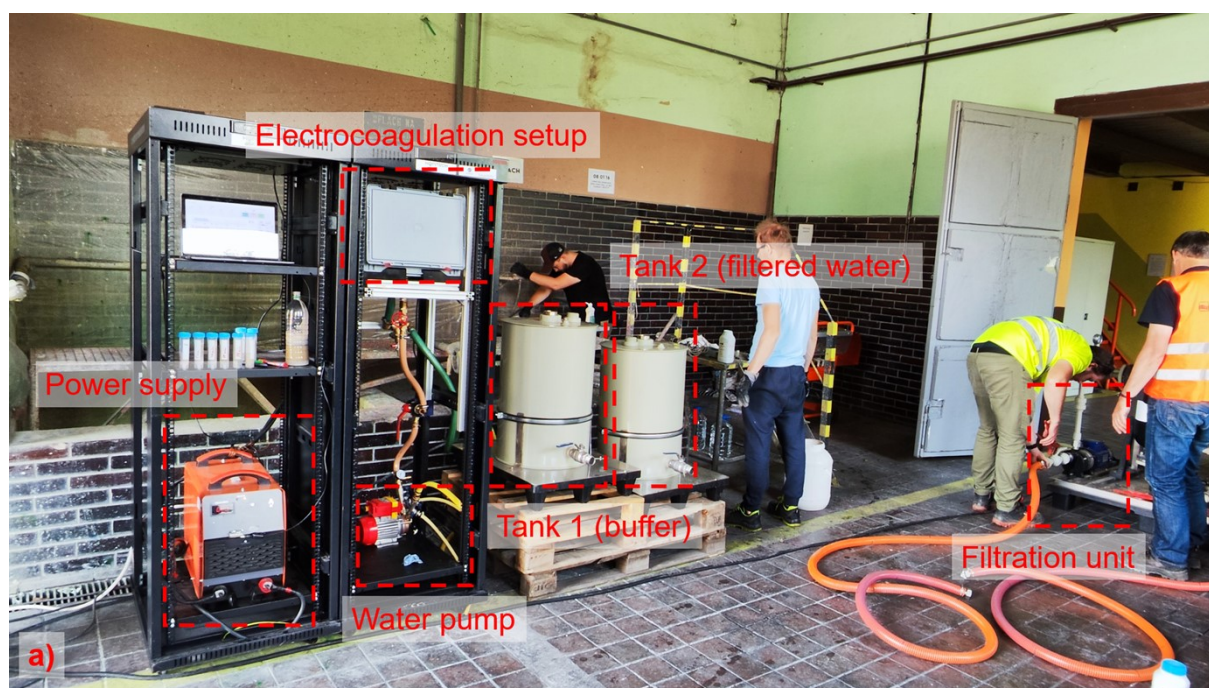

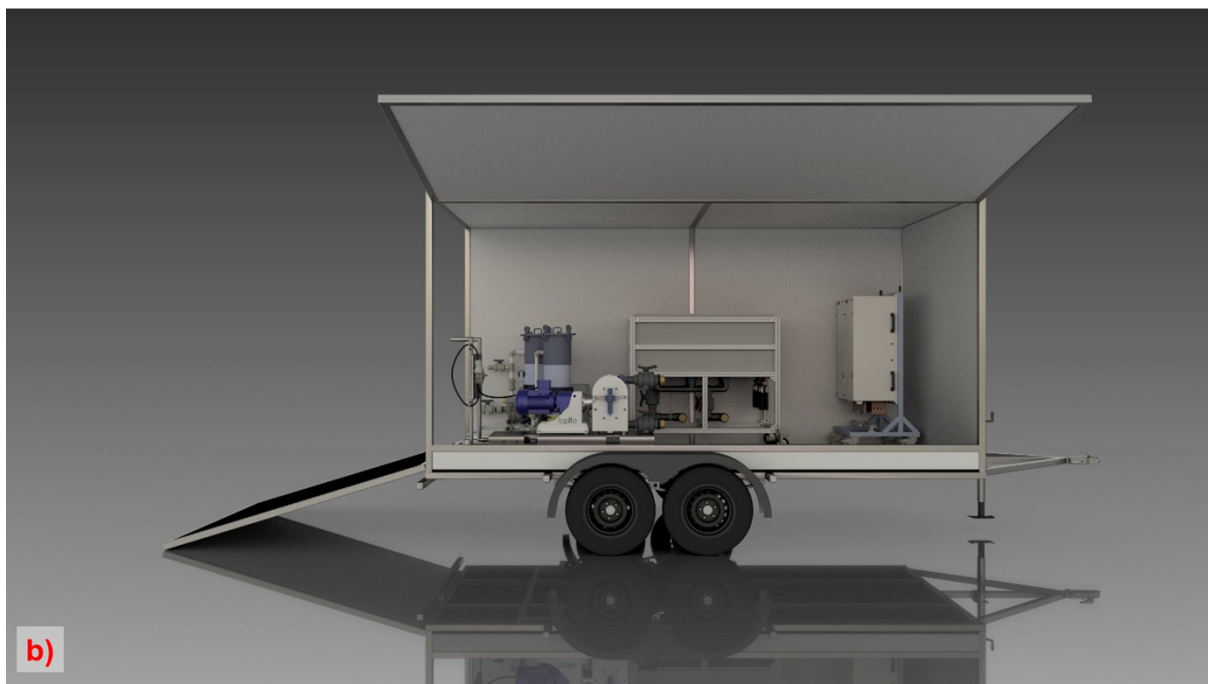

b)

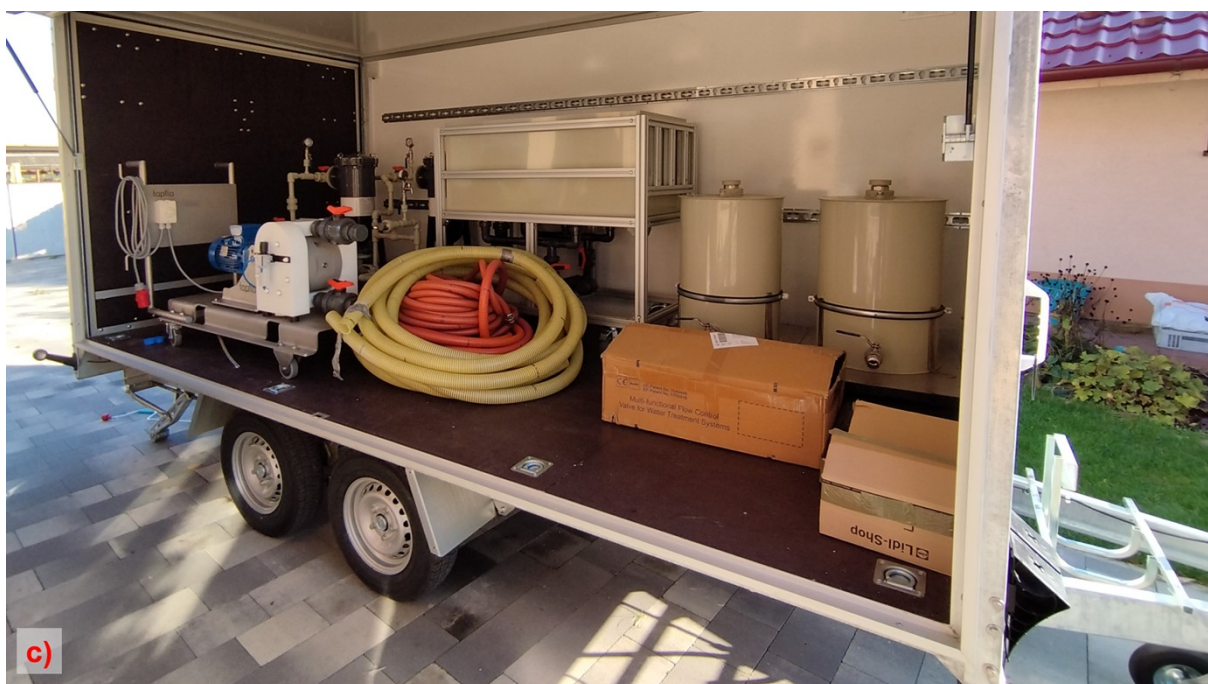

c)

**Figure S1:** a) Actual photograph of the operational electrochemical field setup, b) 3D model of mobile field EC unit and c) actual photograph of the mobile field EC unit.

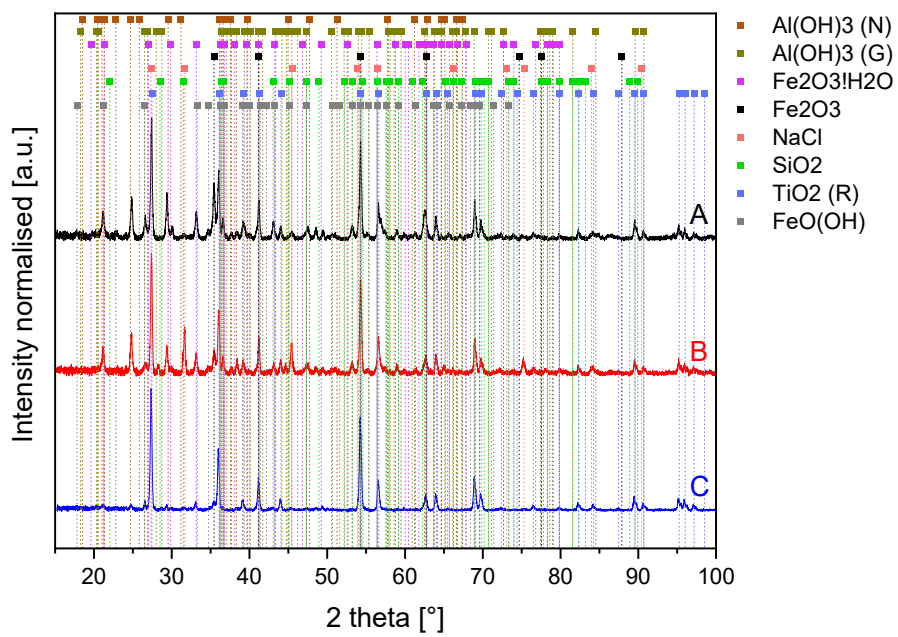

**Figure S2.** XRD spectra of sludge samples A, B and C from wastewater.
